# Supplementary material for: Linoleic acid metabolite leads to steroid resistant asthma features partially through NF-κB
Source: PubMed Central journal article supplement (PMC5575291; doi:10.1038/s41598-017-09869-9), 2017-08-29
Supplement: 41598_2017_9869_MOESM1_ESM.pdf [file 41598_2017_9869_MOESM1_ESM.pdf]

## **Linoleic acid metabolite leads to steroid resistant asthma features partially through NF- $\kappa$ B**

Lipsa Panda,<sup>a</sup> Atish Gheware,<sup>a</sup> Rakhshinda Rehman,<sup>a</sup> Manish K. Yadav,<sup>b</sup> BS Jayaraj,<sup>c</sup> Madhunapantula V. SubbaRao,<sup>b</sup> Padukudru Anand Mahesh,<sup>c</sup> Balaram Ghosh,<sup>a</sup> Anurag Agrawal, <sup>a</sup> Ulaganathan Mabalirajan<sup>a</sup>.

<sup>a</sup>Molecular pathobiology of respiratory diseases, Council of Scientific & Industrial Research (CSIR)-Institute of Genomics and Integrative Biology, Mall Road, Delhi-110007, India.

Departments of Biochemistry<sup>b</sup> and Pulmonary Medicine<sup>c</sup>, JSS Medical College, Jagadguru Sri Shivarathreeshwara University, Mysuru-570015, Karnataka, India.

**Correspondence:** Ulaganathan Mabalirajan, Molecular pathobiology of respiratory diseases, CSIR-Institute of Genomics and Integrative Biology, Mall Road, Delhi-110007, India. Phone: 91-11-27662580. Fax: 91-11-27667471, 91-11-27416489. E-mail ID: [mabsome@yahoo.co.in](mailto:mabsome@yahoo.co.in)

This work was supported by the projects BSC 0116, MLP 5502 (CSIR), GAP 0118 (Department of Biotechnology) and GAP0084 (Department of Science & Technology) at Institute of Genomics & Integrative Biology, Council of Scientific and Industrial Research, Govt. of India.

**Disclosure of potential conflict of interest:** The authors have declared that they have no conflict of interest.

Fig. S1

A

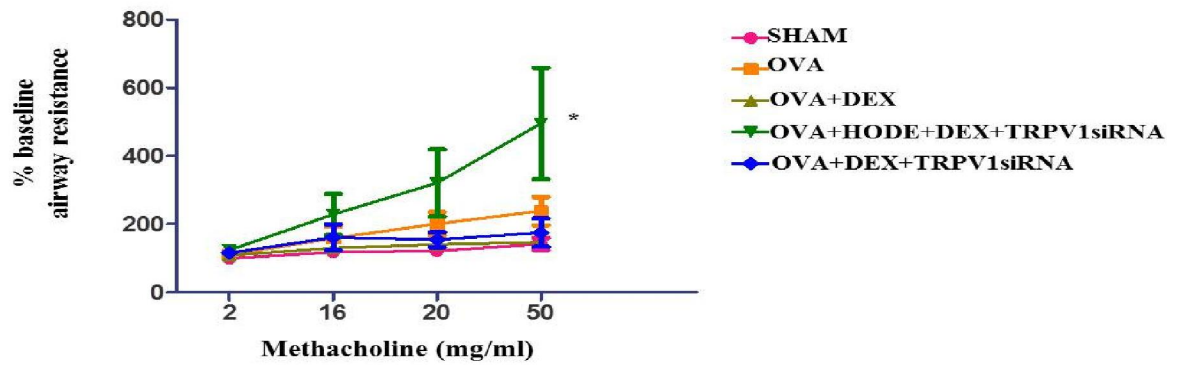

B

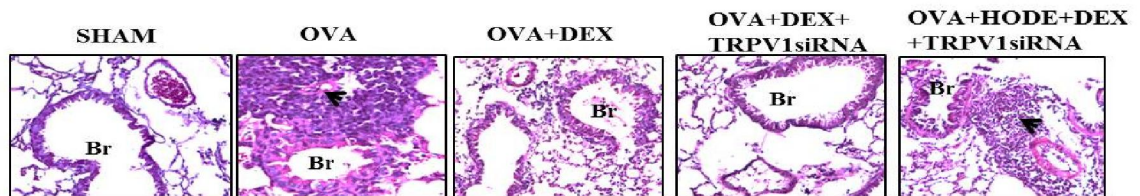

C

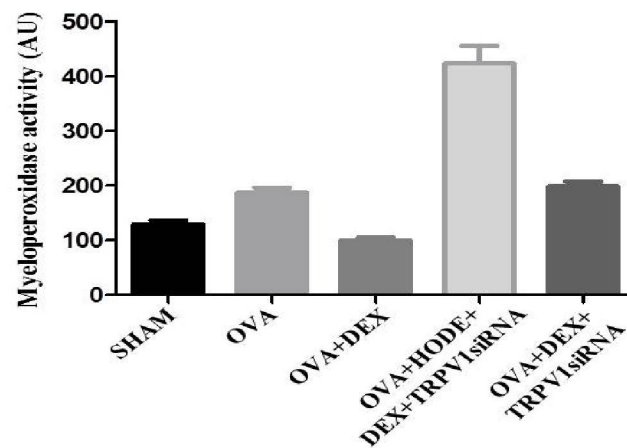

### Supplementary Fig 1. HODE mediated steroid resistance is not mediated by TRPV1

A) The percentage baseline airway resistance in response to increasing concentrations of methacholine, B) Representative photomicrographs (20 X magnifications) of bronchovascular regions of different groups of mice stained with haematoxylin and eosin (H & E), C)

Myeloperoxidase activity in BAL Fluid of TRPV1 knockdown steroid resistant mice. Data represents mean  $\pm$  SE; n= 3-6 each group; \*p <0.05 (OVA+HODE+TRPV1siRNA+DEX versus OVA+DEX+TRPV1siRNA), Br: bronchi.
